# Supplementary material for: Protective Effect of Urtica dioica Extract against Oxidative Stress in Human Skin Fibroblasts
Source: MDPI journal article supplement (doi:10.3390/life13112182), 2023-11-09

Article

# Protective Effect of *Urtica dioica* Extract against Oxidative Stress in Human Skin Fibroblasts

Agnieszka Skalska-Kamińska <sup>1</sup>, Weronika Wójciak <sup>1</sup>, Magdalena Żuk <sup>1</sup>, Roman Paduch <sup>2,3</sup>  
and Magdalena Wójciak <sup>1,\*</sup>

<sup>1</sup> Department of Analytical Chemistry, Medical University of Lublin, Chodźki 4a, 20-093 Lublin, Poland

<sup>2</sup> Department of Virology and Immunology, Institute of Biological Sciences, Faculty of Biology and Biotechnology, Maria Curie-Skłodowska University, 19 Akademicka Street, 20-033 Lublin, Poland

<sup>3</sup> Department of General and Pediatric Ophthalmology, Medical University of Lublin, Chmielna 1, 20-079 Lublin, Poland

\* Correspondence: magdalena.wojciak@umlub.pl

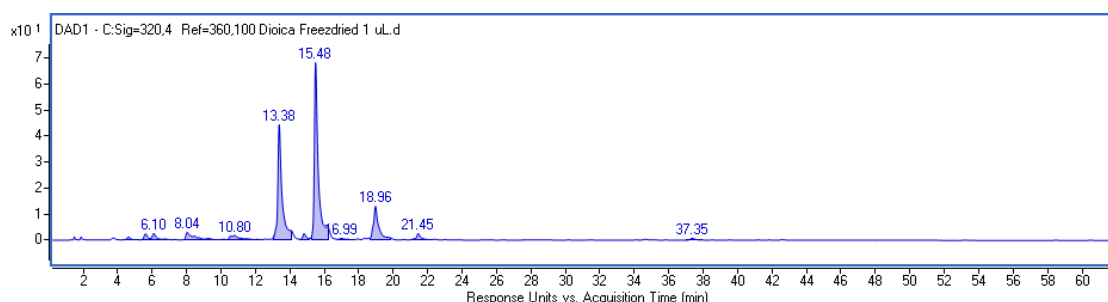

**Figure S1.** Chromatogram of *Urtica dioica* extract registered at wavelength of 320 nm

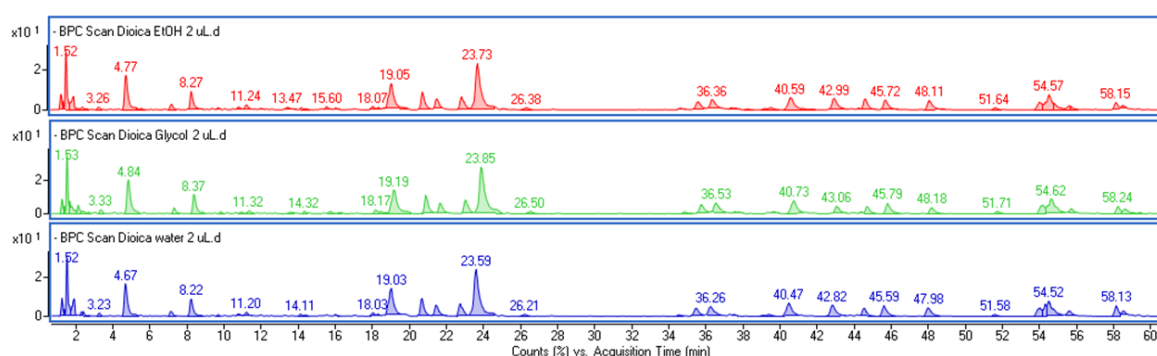

**Figure S2.** BPC chromatograms of extracts obtained through direct extraction with 5% ethanol in water (red line), 10% polypropylene glycol in water (green line) and water (blue line).

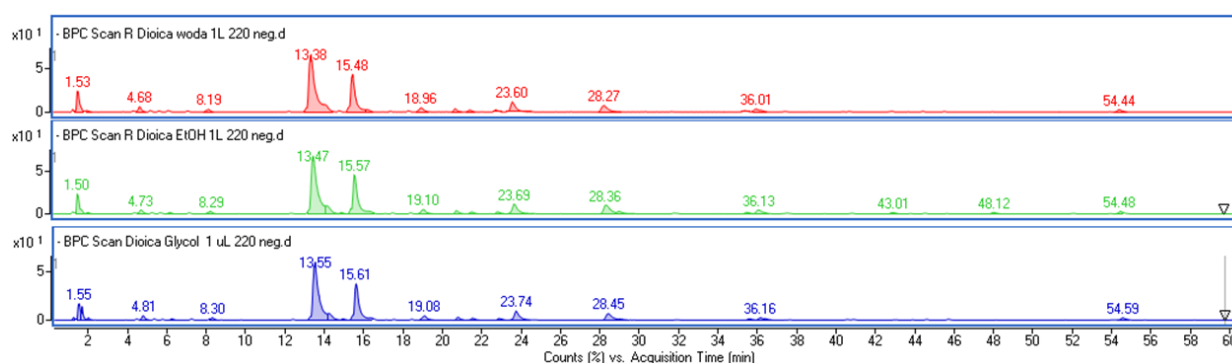

**Figure S3.** BPC chromatograms of extracts obtained through the re-dissolution of a methanol/water extract in water (red line), 5% ethanol in water (green line) and 10% polypropylene glycol in water (blue line).

**Table S1.** Parameters used for quantification of components from *Urtica dioica*.

| $\lambda$ (nm)  | Component              | Range ( $\mu\text{g/mL}$ ) | Linearity ( $r^2$ ) | Equation              |
|-----------------|------------------------|----------------------------|---------------------|-----------------------|
| 320             | Dihydroxybenzoic acid  | 0.2-1                      | 0.9997              | $y = 20.9x + 1.97$    |
| 326             | Chlorogenic acid       | 10-100                     | 0.9999              | $y = 49.3x + 5.1$     |
| 326             | Cryptochlorogenic acid | 1-10                       | 0.9999              | $y = 44.3x + 22.8$    |
| 322             | Caffeic acid           | 1-10                       | 0.9999              | $y = 119.3x + 15.4$   |
| 322             | Caffeic acid           | 10-100                     | 0.9998              | $y = 120.2x - 41.4$   |
| 310             | p-Coumaric acid**      | 1-10                       | 0.9998              | $y = 85.7x + 9.7$     |
| 326             | Ferulic acid           | 0.5-5                      | 0.9998              | $y = 73.7x + 13.4$    |
| 350             | Rutin                  | 1-10                       | 0.9998              | $y = 16.4x + 2.3$     |
| 350             | Isoquercetin           | 0.5-5                      | 0.9997              | $y = 30.5x + 4.2$     |
| m/z-H           | Component              | Range ( $\mu\text{g/mL}$ ) | Linearity ( $r^2$ ) | Equation              |
| 191.055-191.057 | Quinic acid            | 2-20                       | 0.9997              | $y = 684670x - 64178$ |

**Table S2.** Mass spectra and UV-Vis spectra of main component identified in *Urtica dioica* extract. The list of compounds is included in Table 1.

|    | Mass spectrum | UV-Vis spectrum |
|----|---------------|-----------------|
| 1  |               |                 |
| 7  |               |                 |
| 10 |               |                 |
| 12 |               |                 |
| 13 |               |                 |
| 14 |               |                 |

15

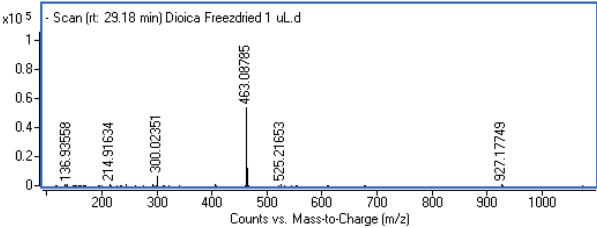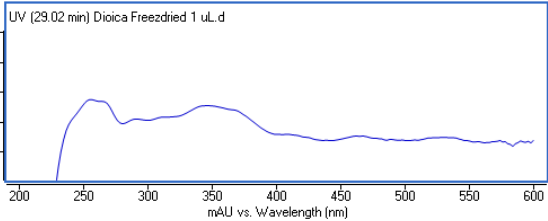

Supplement: s1 [file s1]
